# Supplementary material for: Loneliness as a predictor of outcomes in mental disorders among people who have experienced a mental health crisis: a 4-month prospective study
Source: PubMed Central journal article supplement (PMC7238641; doi:10.1186/s12888-020-02665-2), 2020-05-20
Supplement: 12888_2020_2665_MOESM1_ESM.pdf [file 12888_2020_2665_MOESM1_ESM.pdf]

**Additional file 1: Flowchart of participants at inclusion and follow-up and supplementary results tables**

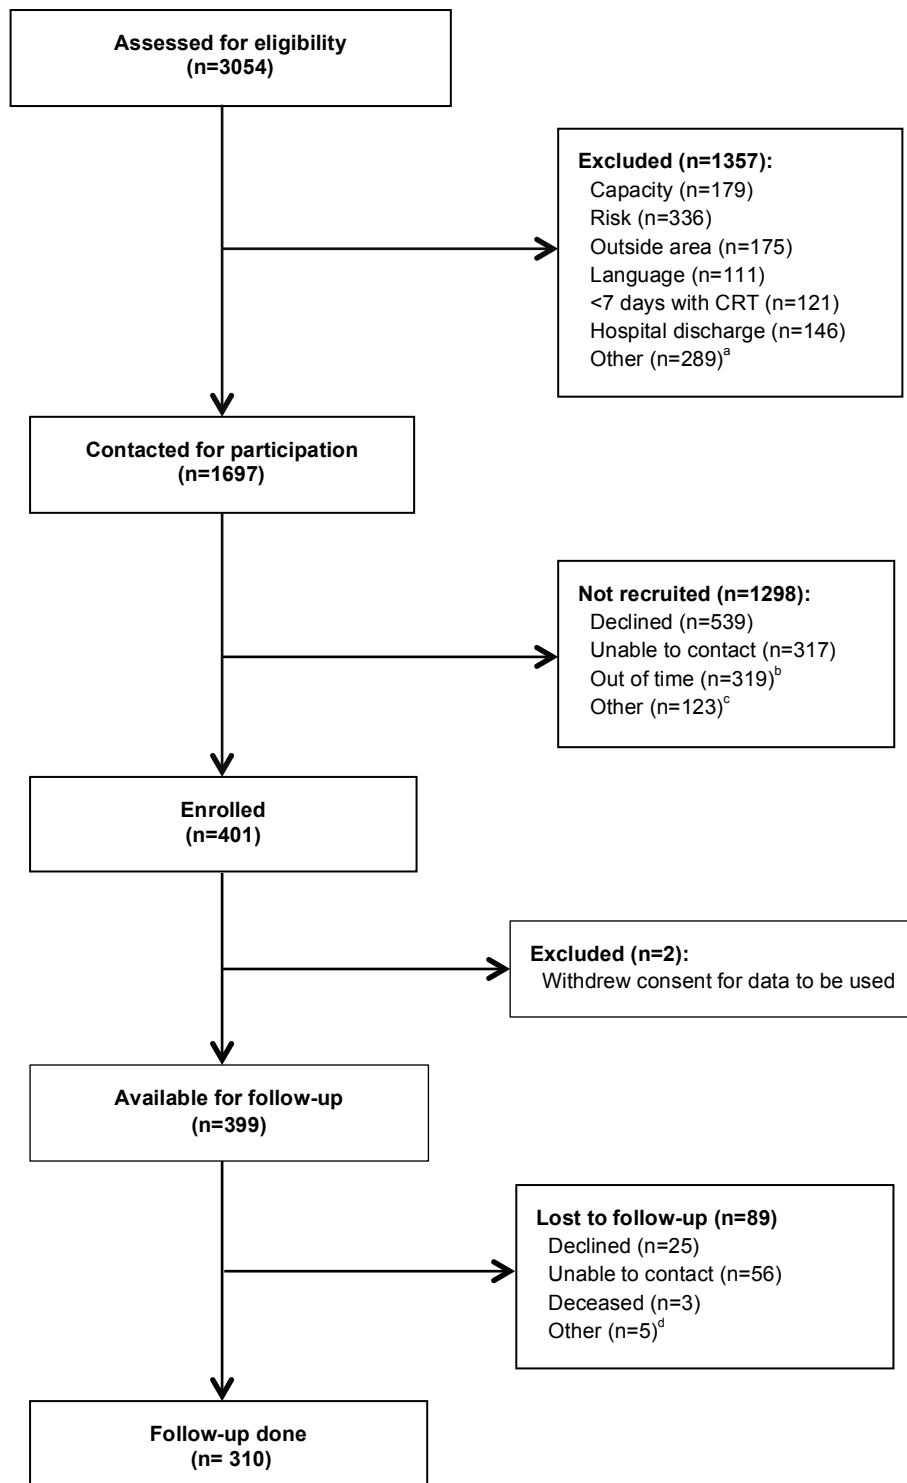

**Figure S1.** Flowchart of participants at inclusion and 4-month follow-up.

<sup>a</sup> Other = Already taking part/declined/screened; Unable to contact/engage; Amendments to screening process (recruitment of non-psychosis/bipolar participants paused April/May 2015)

<sup>b</sup> Out of time = researcher contact but no definitive response from potential participant within 1 month of CRT discharge

<sup>c</sup> Other = Temporary suspension of recruitment of non-psychosis/bipolar participants; Change in risk/capacity status since screening

<sup>d</sup> Other = Unwell; Risk

**Table S1.** Differences between outcome variables at baseline and those at 4-month follow-up

| <b>Variables</b>                       | <b>Baseline, M (SD)</b> | <b>Follow-up, M (SD)</b> | <b>p-Value</b> | <b>Effect size (Cohen's <i>d</i>)</b> |
|----------------------------------------|-------------------------|--------------------------|----------------|---------------------------------------|
| Overall symptom severity (24–168)      | 43.6 (11.5)             | 40.0 (11.9)              | <0.001         | 0.33                                  |
| Affective symptoms (4–28)              | 12.5 (5.5)              | 10.8 (5.3)               | <0.001         | 0.32                                  |
| Self-rated recovery (0–88)             | 51.8 (17.0)             | 56.8 (15.9)              | <0.001         | -0.32                                 |
| Health-related quality of life (0–100) | 53.1 (23.7)             | 59.6 (21.7)              | <0.001         | -0.29                                 |

M, mean; SD, standard deviation.  
Possible range of scores is indicated between brackets.

**Table S2.** Results of univariate linear regression analyses for factors associated with baseline loneliness

| Variables                                                       | Coefficient <sup>a</sup> | 95% CI       | p-Value <sup>b</sup> |
|-----------------------------------------------------------------|--------------------------|--------------|----------------------|
| <b>Socio-demographic variables</b>                              |                          |              |                      |
| Age (years)                                                     | -0.03                    | -0.07, 0.01  | 0.11                 |
| Female gender                                                   | 0.39                     | -0.62, 1.39  | 0.45                 |
| Ethnic background                                               |                          |              |                      |
| White British                                                   | reference                |              |                      |
| White Other                                                     | -0.13                    | -1.82, 1.57  | 0.88                 |
| Black/Black British                                             | -0.44                    | -1.73, 0.85  | 0.50                 |
| Asian/Asian British                                             | 0.62                     | -1.13, 2.37  | 0.49                 |
| Mixed                                                           | -0.83                    | -2.84, 1.18  | 0.42                 |
| Born in the UK                                                  | 1.13                     | -0.04, 2.31  | 0.06                 |
| Independent accommodation                                       | -1.08                    | -2.70, 0.53  | 0.19                 |
| Living with children under 16                                   | -0.73                    | -2.05, 0.58  | 0.27                 |
| Education attainment                                            |                          |              |                      |
| No qualifications                                               | reference                |              |                      |
| Other qualifications                                            | -0.11                    | -1.42, 1.20  | 0.87                 |
| Degree                                                          | 0.23                     | -1.23, 1.70  | 0.76                 |
| Employment                                                      |                          |              |                      |
| No                                                              | reference                |              |                      |
| In voluntary, protected or sheltered work                       | -0.25                    | -2.06, 1.56  | 0.79                 |
| In regular employment                                           | -1.00                    | -2.12, 0.12  | 0.08                 |
| Living with a partner or with family                            | -0.94                    | -1.93, 0.04  | 0.06                 |
| <b>Psychosocial variables</b>                                   |                          |              |                      |
| Social network size (2 items from LSNS-6)                       | -0.79                    | -1.00, -0.59 | <b>&lt;0.001</b>     |
| Social capital (HLSSC)                                          | -0.52                    | -0.68, -0.36 | <b>&lt;0.001</b>     |
| <b>Psychiatric variables</b>                                    |                          |              |                      |
| Number of psychiatric inpatient hospitalisations                |                          |              |                      |
| Never                                                           | reference                |              |                      |
| Once                                                            | -1.29                    | -2.60, 0.03  | 0.06                 |
| 2-5 times                                                       | -1.46                    | -2.71, -0.21 | <b>0.02</b>          |
| More than 5 times                                               | -2.13                    | -3.59, -0.67 | <b>0.004</b>         |
| Number of years since first contact with mental health services |                          |              |                      |
| Less than 3 months                                              | reference                |              |                      |
| 3 months – 1 year                                               | 1.37                     | -0.59, 3.34  | 0.17                 |
| 1-2 years                                                       | 1.80                     | -0.39, 4.00  | 0.11                 |
| 2-10 years                                                      | 1.58                     | 0.10, 3.05   | <b>0.04</b>          |
| More than 10 years                                              | 1.23                     | -0.23, 2.68  | 0.10                 |
| Diagnosis                                                       |                          |              |                      |
| Psychosis                                                       | reference                |              |                      |
| Bipolar affective disorder/Manic episode                        | -0.85                    | -2.37, 0.67  | 0.27                 |
| Depressive/Anxiety disorders                                    | 1.97                     | 0.73, 3.21   | <b>0.002</b>         |
| Personality disorders                                           | 2.60                     | 0.98, 4.23   | <b>0.002</b>         |
| Other disorders                                                 | 1.93                     | 0.01, 3.84   | <b>0.048</b>         |

CI, Confidence Interval; LSNS-6, Lubben Social Network Scale-6; HLSSC, Health and Lifestyles Survey Social Capital Questionnaire.

<sup>a</sup>Negative regression coefficient = less loneliness

<sup>b</sup>Significant p-values printed in bold.

**Table S3.** Results of univariate linear regression analyses for baseline factors associated with outcomes at 4-month follow-up

| Variables                                 | Overall symptoms <sup>a</sup>    | Affective symptoms <sup>b</sup> | Self-rated recovery <sup>c</sup> | Health-related quality of life <sup>d</sup> |
|-------------------------------------------|----------------------------------|---------------------------------|----------------------------------|---------------------------------------------|
|                                           | Regression coefficients (95% CI) |                                 |                                  |                                             |
| <b>Socio-demographic variables</b>        |                                  |                                 |                                  |                                             |
| Age (years)                               | 0.04<br>(-0.06, 0.15)            | 0.01<br>(-0.03, 0.06)           | 0.03<br>(-0.11, 0.17)            | -0.05<br>(-0.24, 0.14)                      |
| Female gender                             | 2.17*<br>(-0.57, 4.91)           | 1.09*<br>(-0.14, 2.32)          | -0.44<br>(-4.08, 3.19)           | -3.42*<br>(-8.44, 1.59)                     |
| Ethnic background                         |                                  |                                 |                                  |                                             |
| White British                             | reference                        |                                 |                                  |                                             |
| White Other                               | -3.40*<br>(-7.83, 1.04)          | -1.64*<br>(-3.62, 0.35)         | 3.66*<br>(-2.24, 9.56)           | 4.78<br>(-3.52, 13.08)                      |
| Black/Black British                       | 0.78<br>(-2.80, 4.36)            | -0.51<br>(-2.11, 1.09)          | 2.41<br>(-2.34, 7.16)            | 1.27<br>(-5.29, 7.84)                       |
| Asian/Asian British                       | -1.21<br>(-5.88, 3.46)           | -1.44*<br>(-3.53, 0.65)         | -0.67<br>(-6.89, 5.54)           | 0.50<br>(-8.03, 9.03)                       |
| Mixed                                     | -0.02<br>(-5.36, 5.32)           | -1.80*<br>(-4.18, 0.59)         | 3.02<br>(-4.08, 10.13)           | -1.51<br>(-11.26, 8.23)                     |
| Born in the UK                            | 2.86*<br>(-0.30, 6.01)           | 1.21*<br>(-0.20, 2.63)          | -2.95*<br>(-7.16, 1.25)          | -4.22*<br>(-10.04, 1.61)                    |
| Independent accommodation                 | -4.73*<br>(-9.69, 0.24)          | -0.88<br>(-3.13, 1.36)          | 1.93<br>(-4.58, 8.45)            | 3.88<br>(-5.01, 12.78)                      |
| Living with children under 16             | -1.14<br>(-4.73, 2.46)           | -1.14*<br>(-2.75, 0.47)         | 1.07<br>(-3.72, 5.85)            | 3.82<br>(-2.72, 10.36)                      |
| Education attainment                      |                                  |                                 |                                  |                                             |
| No qualifications                         | reference                        |                                 |                                  |                                             |
| Other qualifications                      | -3.07*<br>(-6.71, 0.57)          | -0.52<br>(-2.18, 1.13)          | 2.23<br>(-2.62, 7.07)            | 1.78<br>(-4.87, 8.42)                       |
| Degree                                    | -3.88*<br>(-7.87, 0.11)          | -0.42<br>(-2.24, 1.40)          | 1.81<br>(-3.51, 7.13)            | -1.92<br>(-9.25, 5.40)                      |
| Employment                                |                                  |                                 |                                  |                                             |
| No                                        | reference                        |                                 |                                  |                                             |
| In voluntary, protected or sheltered work | -1.97<br>(-6.61, 2.67)           | -1.80*<br>(-3.92, 0.32)         | 4.60*<br>(-1.68, 10.88)          | 4.88<br>(-3.84, 13.59)                      |
| In regular employment                     | -6.03**<br>(-8.93, -3.13)        | -1.41**<br>(-2.73, -0.09)       | 4.44**<br>(0.53, 8.34)           | 7.41**<br>(2.04, 12.77)                     |
| Living with a partner or with family      | -3.50**<br>(-6.16, -0.84)        | -1.47**<br>(-2.67, -0.28)       | 2.51*<br>(-1.06, 6.08)           | 4.90*<br>(-0.02, 9.82)                      |
| <b>Psychosocial variables</b>             |                                  |                                 |                                  |                                             |
| Loneliness (ULS-8)                        | 0.92**<br>(0.66, 1.17)           | 0.41**<br>(0.30, 0.53)          | -1.38**<br>(-1.71, -1.05)        | -1.69**<br>(-2.16, -1.23)                   |
| Social network size (2 items from LSNS-6) | -1.04**<br>(-1.62, -0.46)        | -0.37**<br>(-0.63, -0.11)       | 1.32**<br>(0.55, 2.08)           | 2.29**<br>(1.25, 3.34)                      |
| Social capital (HLSSC)                    | -0.97**<br>(-1.44, -0.50)        | -0.39**<br>(-0.60, -0.18)       | 1.24**<br>(0.62, 1.86)           | 1.74**<br>(0.89, 2.59)                      |

| Variables                                                       | Overall symptoms <sup>a</sup>    | Affective symptoms <sup>b</sup> | Self-rated recovery <sup>c</sup> | Health-related quality of life <sup>d</sup> |
|-----------------------------------------------------------------|----------------------------------|---------------------------------|----------------------------------|---------------------------------------------|
|                                                                 | Regression coefficients (95% CI) |                                 |                                  |                                             |
| (Continued from previous page)                                  |                                  |                                 |                                  |                                             |
| <b>Psychiatric variables</b>                                    |                                  |                                 |                                  |                                             |
| Number of psychiatric inpatient hospitalisations                |                                  |                                 |                                  |                                             |
| Never                                                           | reference                        |                                 |                                  |                                             |
| Once                                                            | -0.30<br>(-3.94, 3.33)           | -0.27<br>(-1.89, 1.36)          | -1.96<br>(-6.74, 2.81)           | -0.76<br>(-7.38, 5.86)                      |
| 2-5 times                                                       | 1.45<br>(-1.95, 4.86)            | -0.53<br>(-2.06, 1.00)          | -2.02<br>(-6.51, 2.48)           | -2.92<br>(-9.13, 3.28)                      |
| More than 5 times                                               | 1.93<br>(-2.24, 6.10)            | -0.50<br>(-2.37, 1.38)          | 2.14<br>(-3.39, 7.67)            | -2.69<br>(-10.38, 4.99)                     |
| Number of years since first contact with mental health services |                                  |                                 |                                  |                                             |
| Less than 3 months                                              | reference                        |                                 |                                  |                                             |
| 3 months – 1 year                                               | -1.27<br>(-6.65, 4.11)           | -1.84*<br>(-4.26, 0.58)         | -0.27<br>(-7.26, 6.72)           | 3.77<br>(-5.87, 13.41)                      |
| 1-2 years                                                       | 5.63*<br>(-0.53, 11.80)          | 2.30*<br>(-0.42, 5.02)          | -13.05**<br>(-20.78, -5.32)      | -15.53**<br>(-26.17, -4.89)                 |
| 2-10 years                                                      | 4.20**<br>(0.28, 8.13)           | 1.00<br>(-0.77, 2.77)           | -10.27**<br>(-15.36, -5.18)      | -11.34**<br>(-18.45, -4.23)                 |
| More than 10 years                                              | 4.17**<br>(0.34, 8.01)           | 0.79<br>(-0.93, 2.52)           | -5.64**<br>(-10.60, -0.68)       | -10.33**<br>(-17.20, -3.45)                 |
| Diagnosis                                                       |                                  |                                 |                                  |                                             |
| Psychosis                                                       | reference                        |                                 |                                  |                                             |
| Bipolar affective disorder/Manic episode                        | -2.46<br>(-6.67, 1.74)           | 0.13<br>(-1.74, 1.99)           | 0.49<br>(-5.12, 6.09)            | 1.52<br>(-6.20, 9.25)                       |
| Depressive/Anxiety disorders                                    | -0.90<br>(-4.35, 2.56)           | 1.48*<br>(-0.05, 3.01)          | -2.82*<br>(-7.40, 1.75)          | -1.53<br>(-7.85, 4.79)                      |
| Personality disorders                                           | 4.00*<br>(-0.65, 8.66)           | 3.98**<br>(1.92, 6.04)          | -7.35**<br>(-13.50, -1.20)       | -3.61<br>(-12.12, 4.90)                     |
| Other disorders                                                 | -3.23*<br>(-8.51, 2.05)          | 0.61<br>(-1.73, 2.95)           | 3.05<br>(-3.99, 10.08)           | 9.82**<br>(0.17, 19.47)                     |

ULS-8, UCLA Loneliness Scale-8; LSNS-6, Lubben Social Network Scale-6; HLSSC, Health and Lifestyles Survey Social Capital Questionnaire.

<sup>a</sup>Using univariate linear regression analyses with overall symptom severity score at 4-month follow-up as dependent variable. Negative regression coefficient = less severe overall symptoms.

<sup>b</sup>Using univariate linear regression analyses with affective symptoms score at 4-month follow-up as dependent variable. Negative regression coefficient = less severe affective symptoms.

<sup>c</sup>Using univariate linear regression analyses with self-rated recovery score at 4-month follow-up as dependent variable. Negative regression coefficient = poorer self-rated recovery.

<sup>d</sup>Using univariate linear regression analyses with health-related quality of life score at 4-month follow-up as dependent variable. Negative regression coefficient = poorer health-related quality of life.

\* $p < 0.25$

\*\* $p < 0.05$
